# Supplementary material for: A facile approach for the preparation of cross-linked sulfonated polyimide membranes for fuel cell application
Source: Royal Society of Chemistry journal article supplement (doi:10.1039/b613561g), 2006-12-22
Supplement: b613561g.pdf [file b613561g.pdf]

Supporting Information

A Facile Approach for Preparation of Cross-linked Sulfonated Polyimide Membranes for Fuel Cell  
Application

Jianhua Fang,\*<sup>1</sup> Xiaoxia Guo,<sup>1</sup> Hongjie Xu<sup>1</sup> and Ken-ichi Okamoto<sup>2</sup>

<sup>1</sup>School of Chemistry and Chemical Technology, Shanghai Jiao Tong University, Shanghai 200240, China. <sup>2</sup>Department of Advanced Materials & Engineering, Faculty of Engineering, Yamaguchi University, 2-16-1 Tokiwadai, Ube, Yamaguchi 755-8611, Japan

**Scheme S1: Synthesis of Model Compounds**

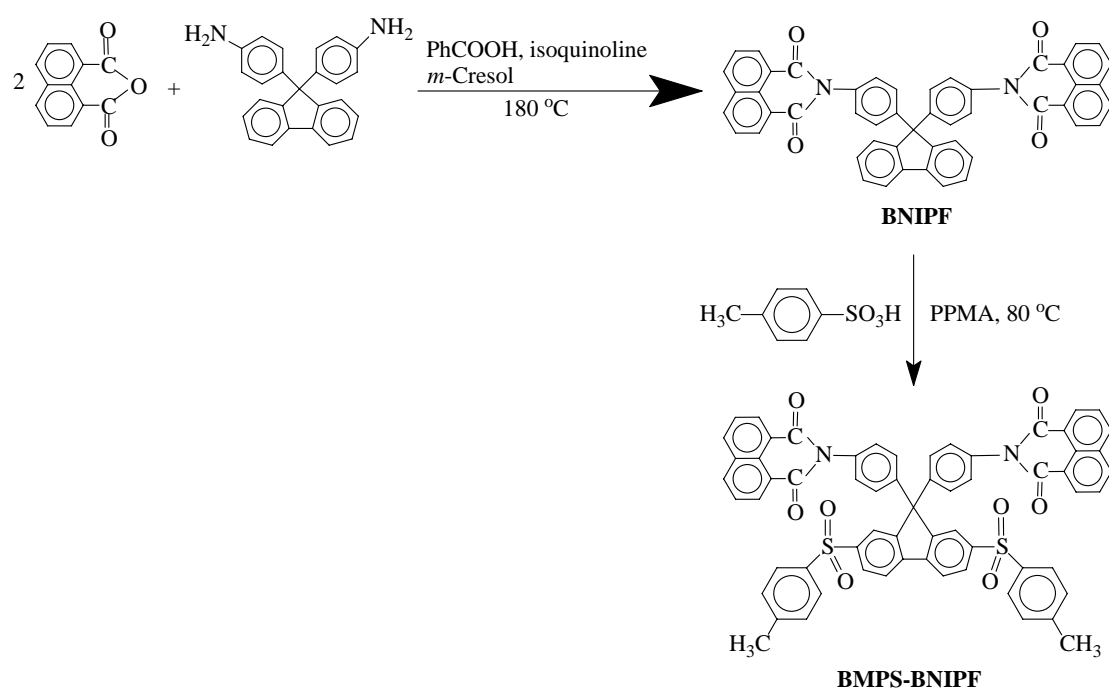

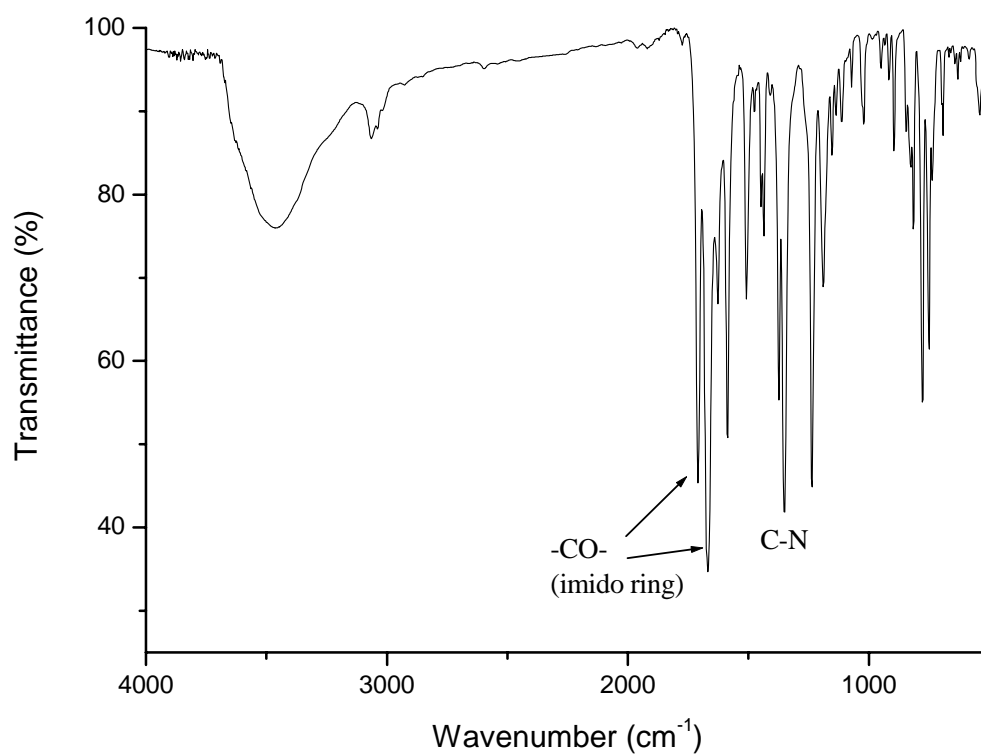

Figure S1: FT-IR spectrum of 9,9-bis(4-(1,5-naphthylimido)phenyl)fluorene (BNIPF).

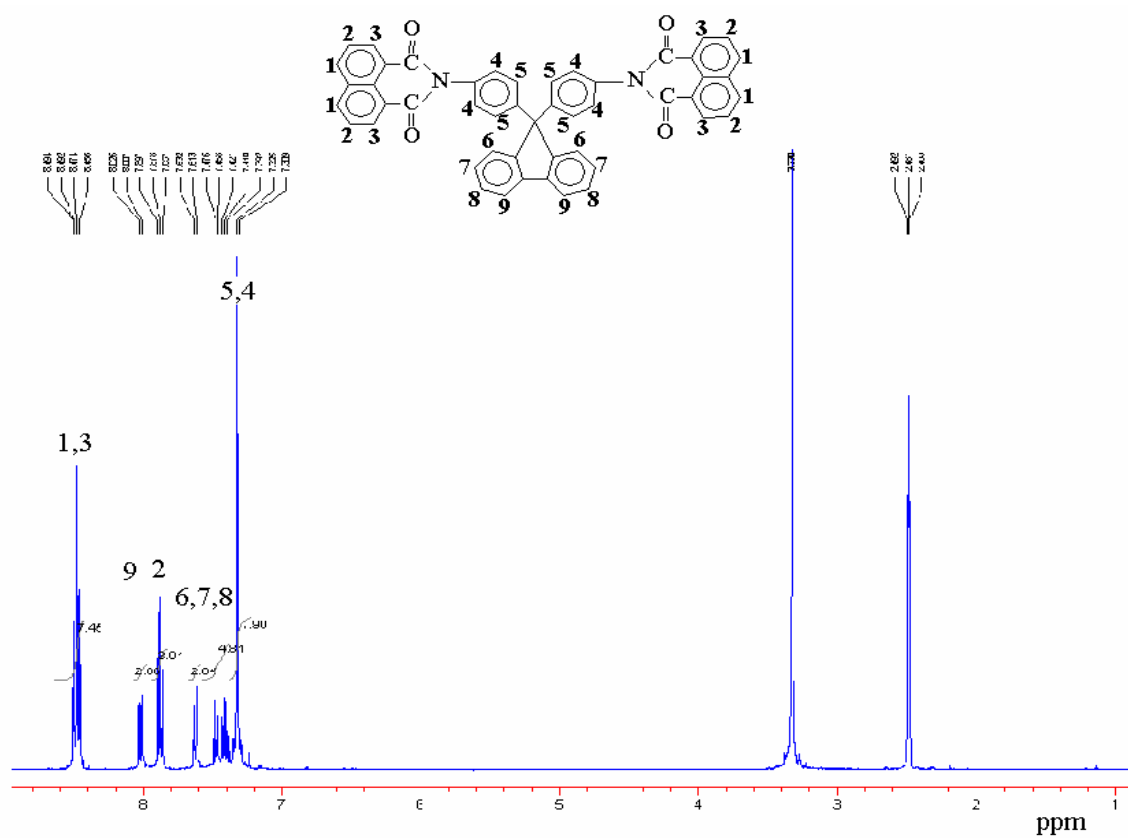

Figure S2: <sup>1</sup>H NMR spectrum of 9,9-bis(4-(1,5-naphthylimido)phenyl)fluorene (BNIPF) in DMSO-d<sub>6</sub>.

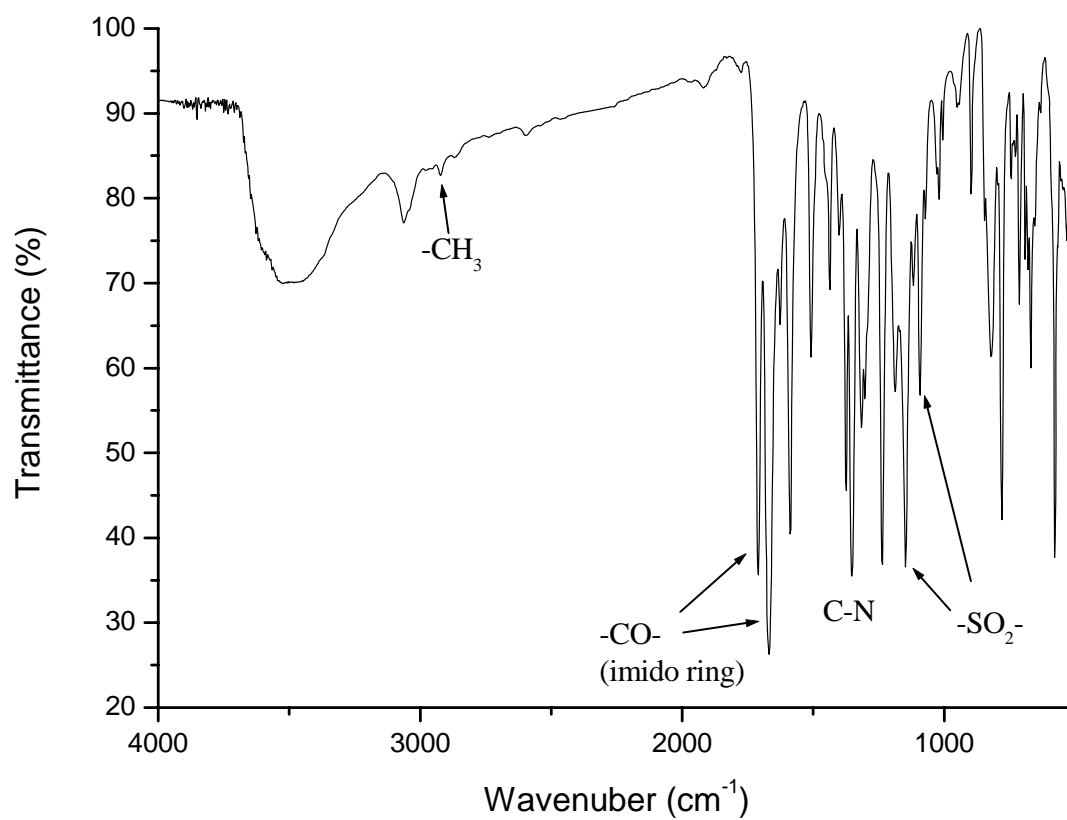

Figure S3: FT-IR spectrum of 2,7-bis(4-methylphenylsulfonyl)-9,9-bis(4-(1,5-naphthylimido)phenyl)-fluorene (BMPS-BNIPF).

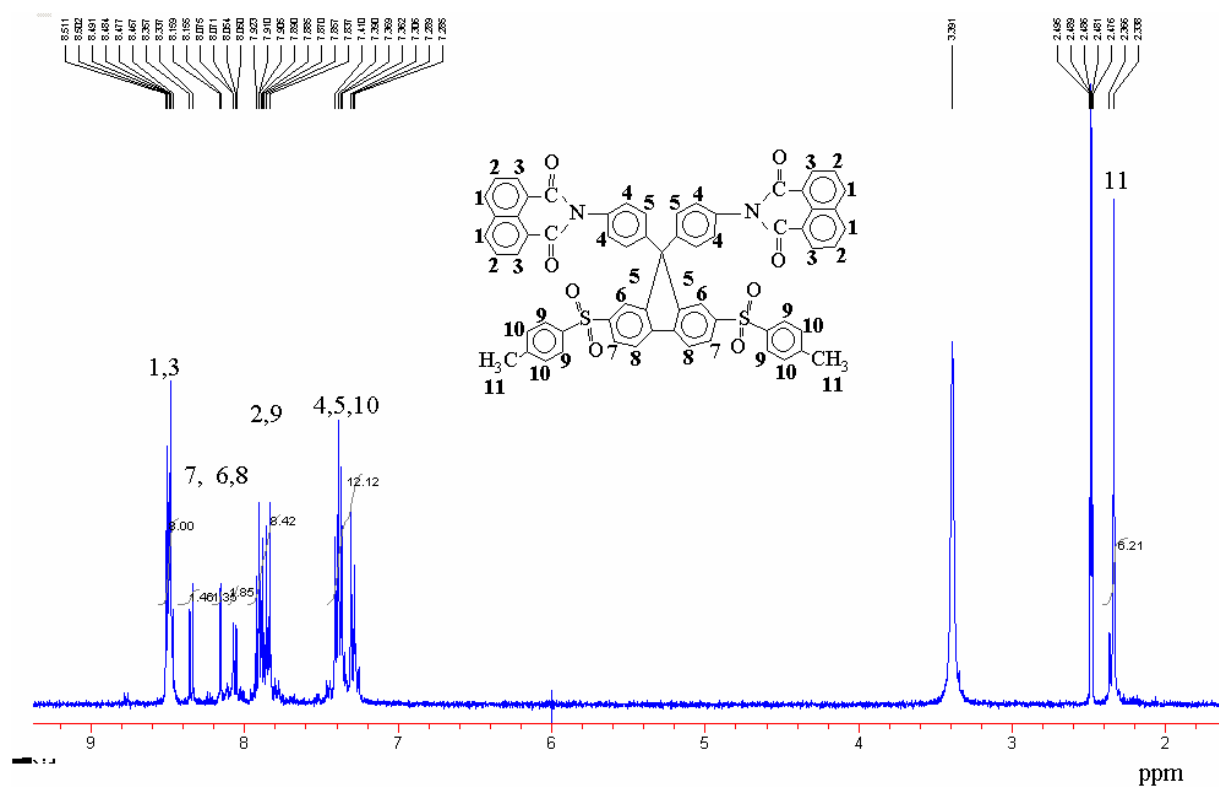

Figure S4: <sup>1</sup>H NMR spectrum of 2,7-bis(4-methylphenylsulfonyl)-9,9-bis(4-(1,5-naphthylimido)-phenyl)fluorene (BMPS-BNIPF) in DMSO-d<sub>6</sub>.
